# Supplementary material for: Gene expression profiling identifies the role of Zac1 in cervical cancer metastasis
Source: Sci Rep. 2020 Jul 16;10:11837. doi: 10.1038/s41598-020-68835-0 (PMC7367306; doi:10.1038/s41598-020-68835-0)
Supplement: Supplementary file 3 — Supplementary Information 3. (PDF 1878 kb) [file 41598_2020_68835_MOESM3_ESM.pdf]

## **Title**

Gene Expression Profiling Identifies the Role of Zac1 in Cervical Cancer Metastasis

## **Authors**

Hui-Chen Su<sup>1§</sup>, Sheng-Cheng Wu<sup>2§</sup>, Li-Chen Yen<sup>3</sup>, Li-Kang Chiao<sup>4</sup>, Jehng-Kang Wang<sup>4</sup>, Yi-Lin Chiu<sup>4\*</sup>, Ching-Liang Ho<sup>5</sup>, Shih-Ming Huang<sup>4\*</sup>

§ and \*: These two authors contributed equally to this study

- 1 Department of Pharmacy, Chi-Mei Medical Center, Tainan, Taiwan (R.O.C.)
- 2 Department of Internal Medicine, Tri-Service General Hospital Penghu Branch, Penghu, Taiwan (R.O.C.)
- 3 Department of Microbiology and Immunology, National Defense Medical Center, Taipei, Taiwan (R.O.C.)
- 4 Department of Biochemistry, National Defense Medical Center, Taipei, Taiwan (R.O.C.)
- 5 Division of Hematology/Oncology, Department of Internal Medicine, Tri-Service General Hospital, National Defense Medical Center, Taipei, Taiwan (R.O.C.)

## **Correspondence to:**

Assistant Professor Yi-Lin Chiu, Department of Biochemistry, National Defense Medical Center, Neihu dist., Taipei city 114, Taiwan (R.O.C.), Email: yc566@georgetown.edu

Professor Shih-Ming Huang, Department of Biochemistry, National Defense Medical Center, Neihu dist., Taipei city 114, Taiwan (R.O.C.), Email: shihming@mail.ndmctsgh.edu.tw

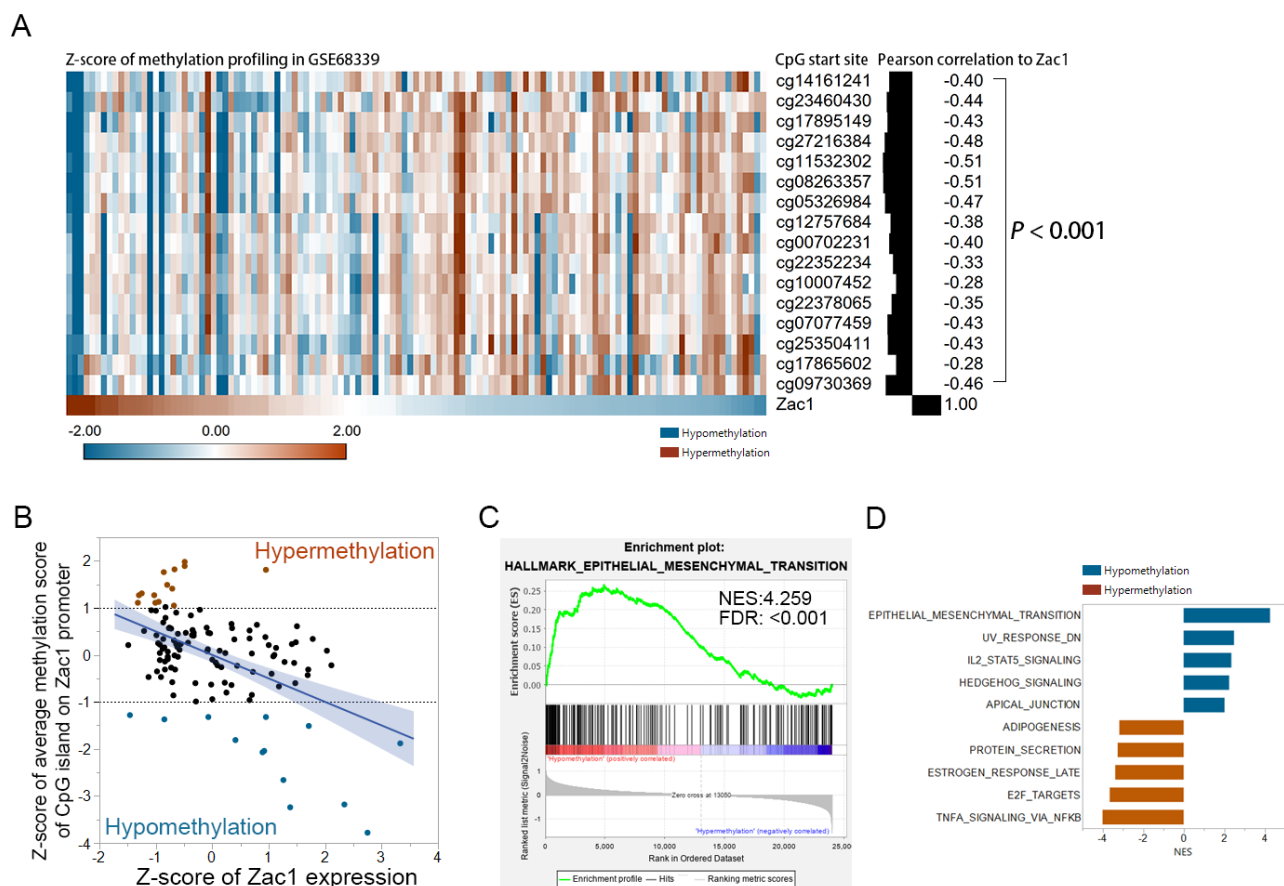

**Supplementary Figure 1 Methylation profiling of Zac1 promoter and correlated gene set enrichment analysis in GSE68339**

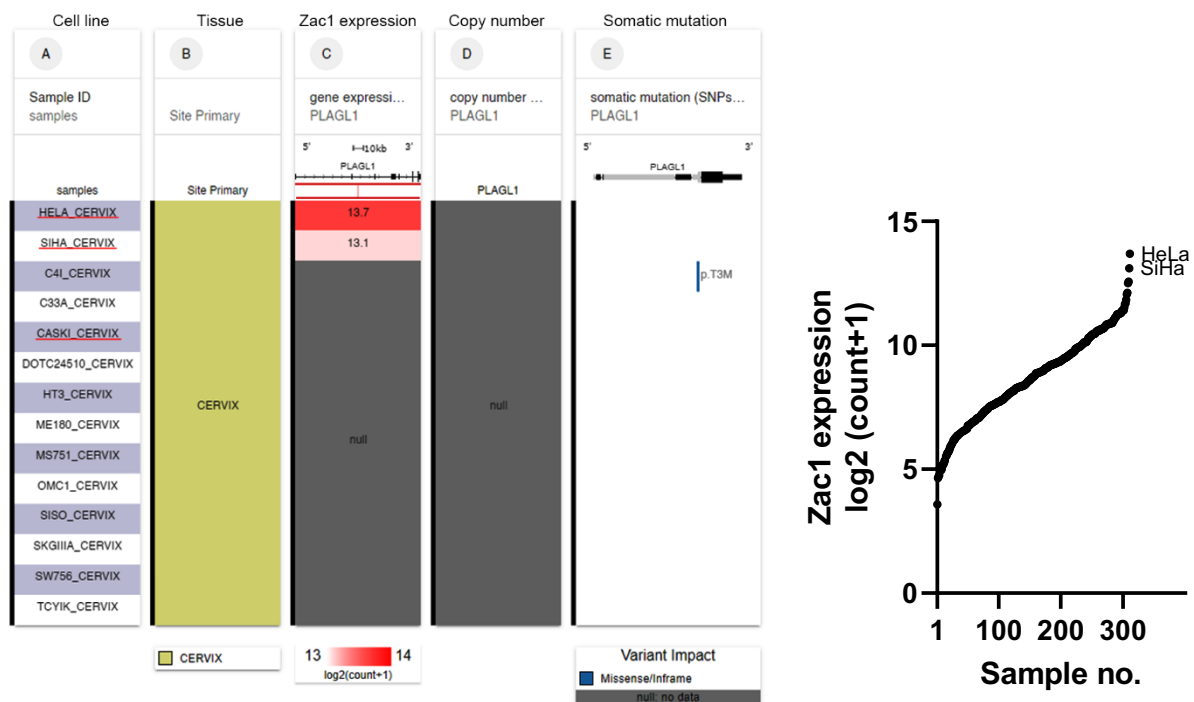

**Supplementary figure 2 Status of Zac1 expression (aligned with samples of TCGA-CESC), copy number variation, and somatic mutation in HeLa, SiHa, and Caski cervical cancer cell lines.**

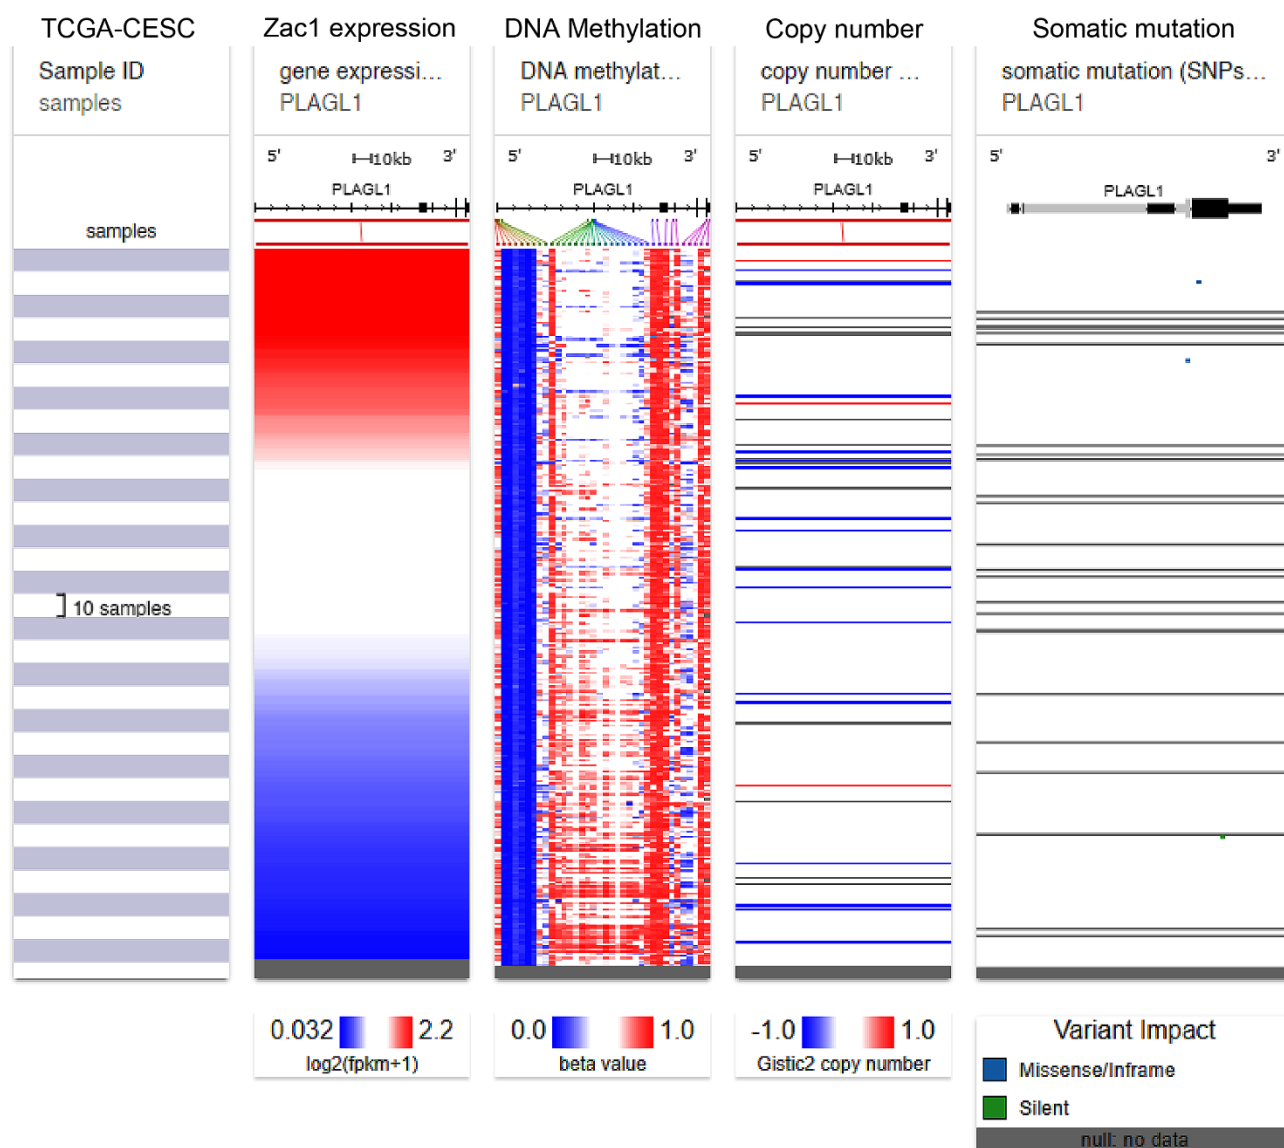

**Supplementary Figure 3 Status of Zac1 expression, methylation profiling on Zac1 promoter, copy number variation, and somatic mutation in TCGA-CESC**

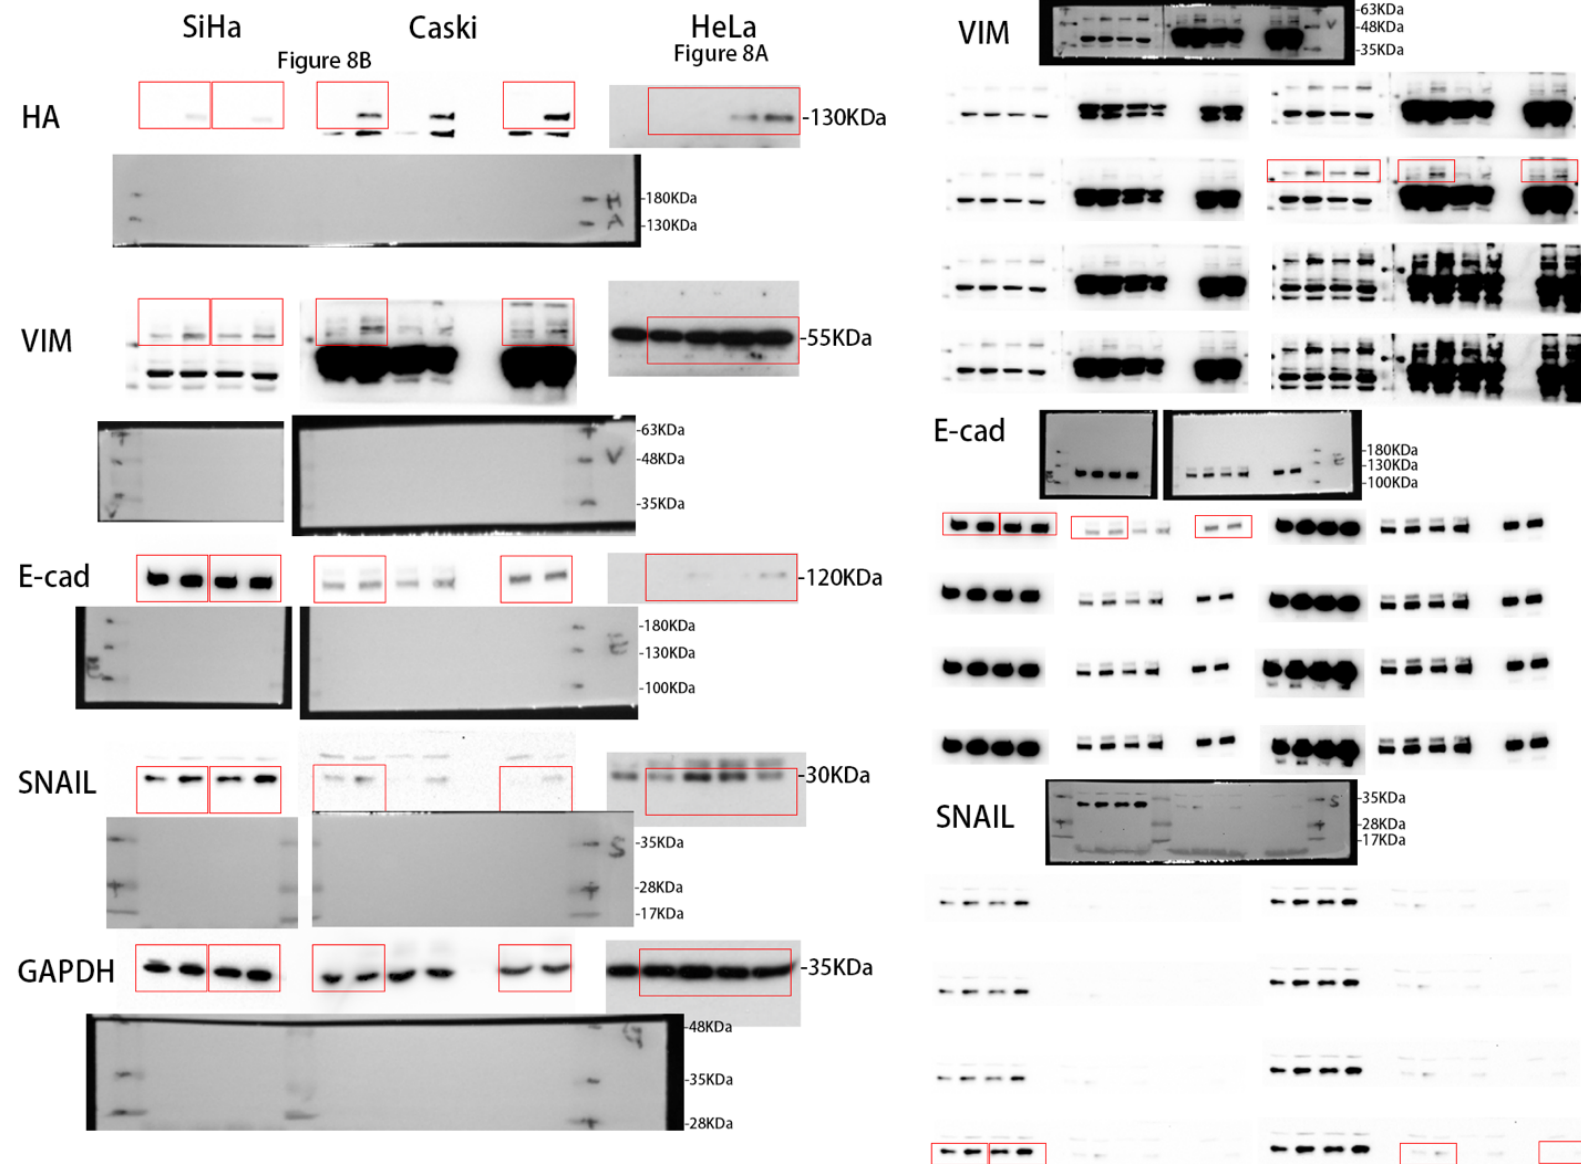

**Supplementary Figure 4** The original western blots presented in Figure 8. (With the combined signal on membrane and multiple exposure timepoints)
